# Supplementary figures and images for: Identifying gene regulatory elements by genomic microarray mapping of DNaseI hypersensitive sites
Source: HighWire-hosted journal article supplement (doi:10.1101/gr.5373606), 2006-09-08

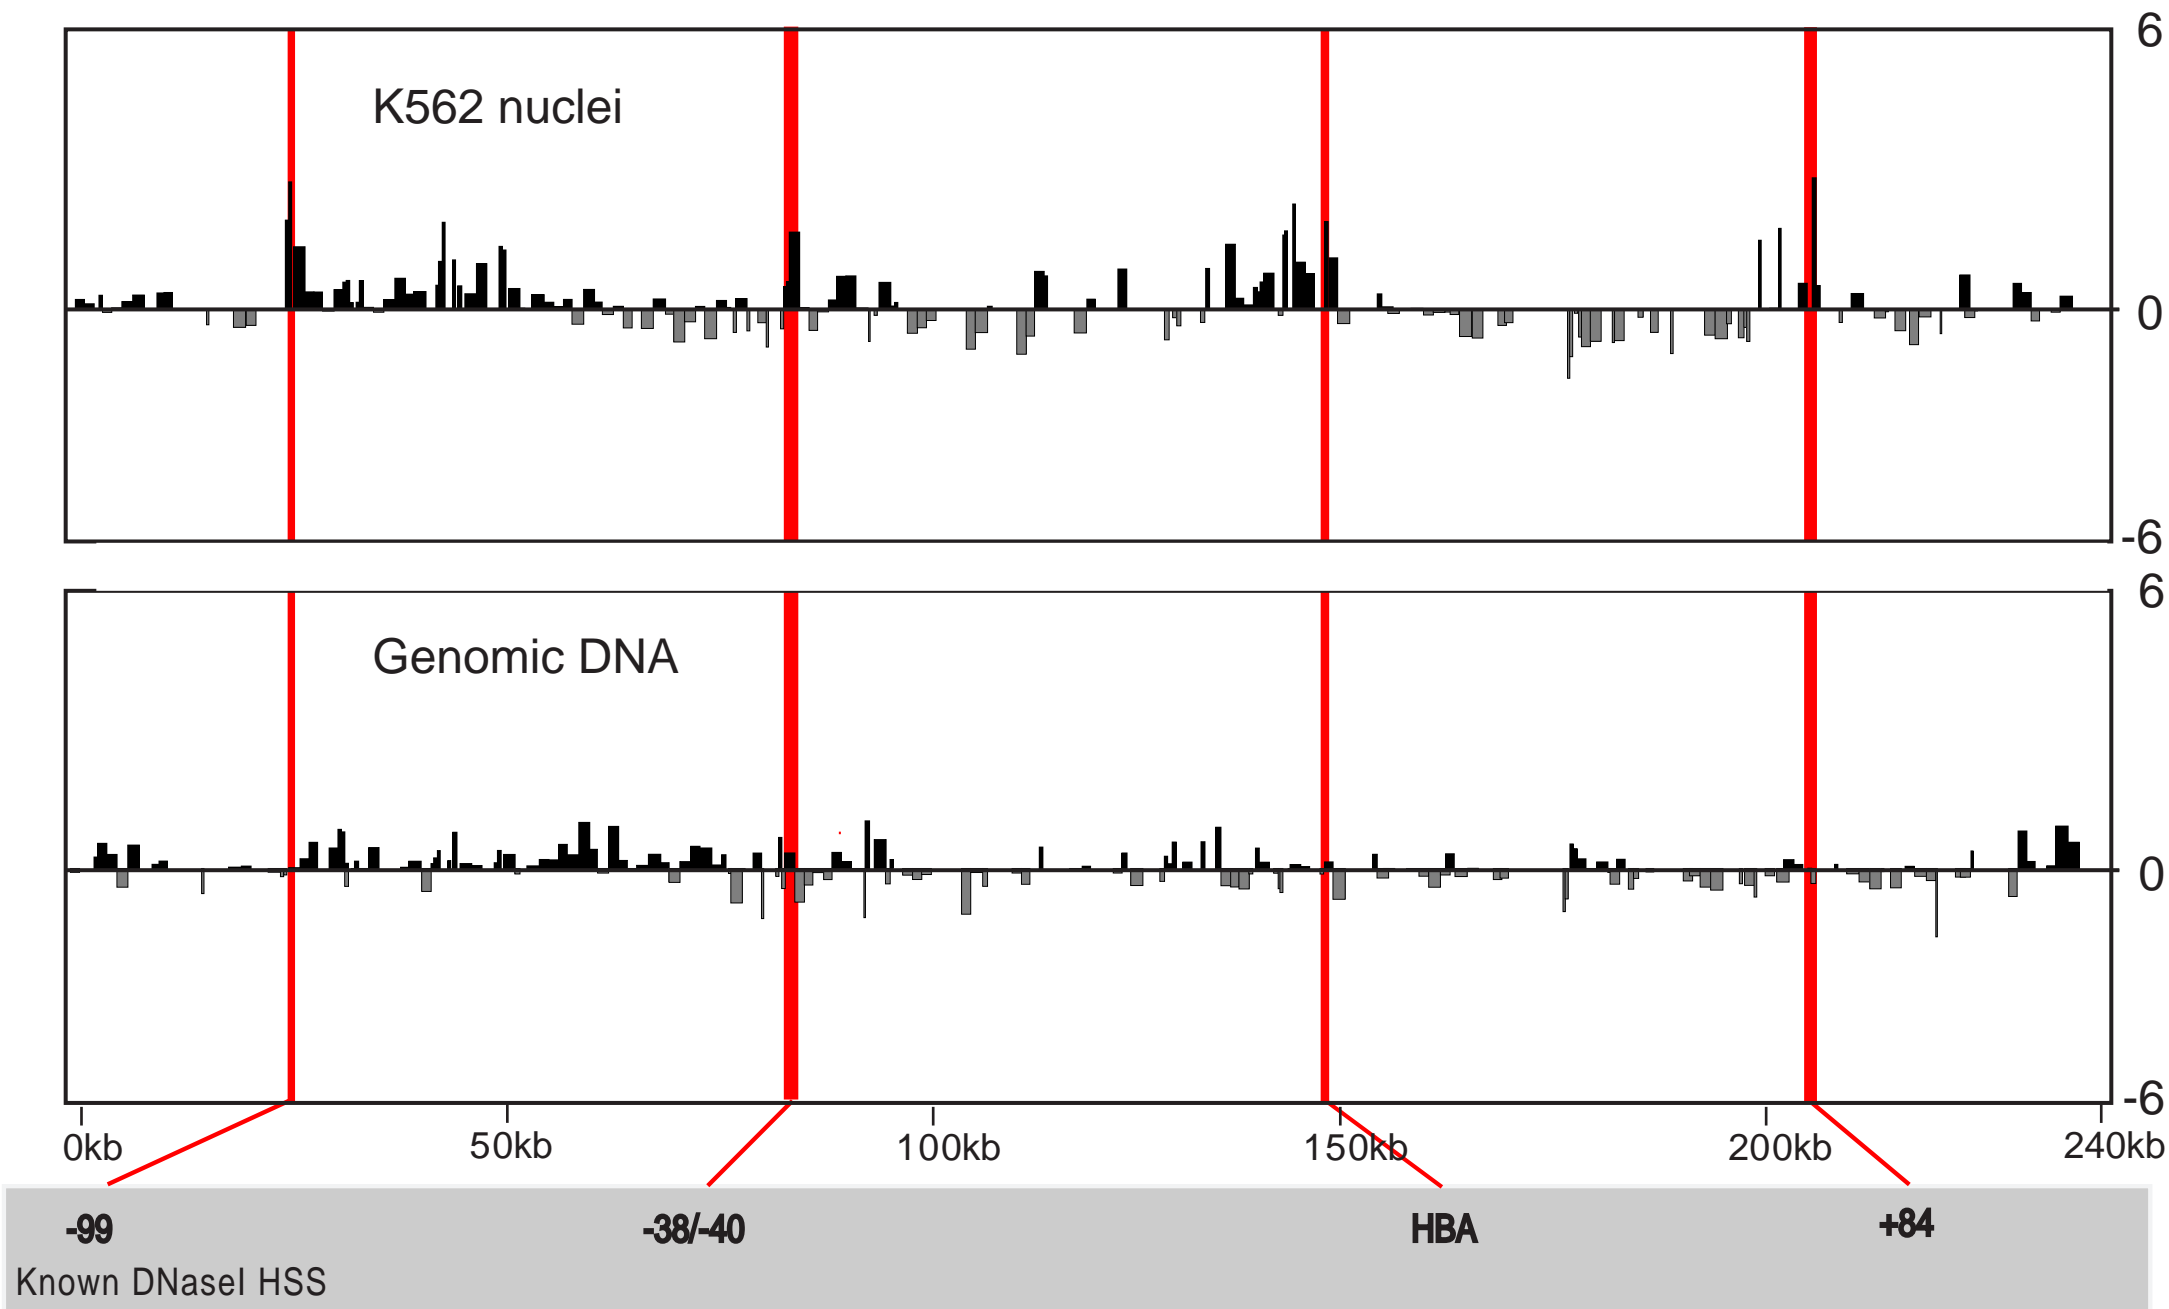

Supplementary data Figure 7 (Follows)

Supplement: Supplementary_data_figure_7_Follows.pdf [file Supplementary_data_figure_7_Follows.pdf]
